# Supplementary material for: R2R3-MYBs in Durum Wheat: Genome-Wide Identification, Poaceae-Specific Clusters, Expression, and Regulatory Dynamics Under Abiotic Stresses
Source: Front Plant Sci. 2022 Jun 20;13:896945. doi: 10.3389/fpls.2022.896945 (PMC9252425; doi:10.3389/fpls.2022.896945)
Supplement: Supplementary file 6 [file Table_6.XLSX]

## Sheet: Sheet 1
Supplementary Table 6. Gene targets identified in the gene regulatory network (GRN) analysis. Additional information on orthology and functional annotation (from PLAZA Monocots 5.0) and phenotype (from RARGE II) is presented.
Transcription Factor	Target number	Target	Description (PLAZA)	Gene ontology ID (not propagated)	Gene ontology description	GRN weight	Ath Ortholog	Paralog	Gene name (Ath)	Plant Ontology (PO) Description	Phenotype and trait Ontology (PATO)	Trait Description
TRITD6Av1G075070 (TdMYB6A089)	1	TRITD1Av1G024610	Endoglucanase			0.021852	AT2G44540		GH9B9
							AT2G44550		GH9B10
							AT2G44560		GH9B11
							AT2G44570		GH9B12
	2	TRITD1Av1G138730	Beta-amylase	GO:0009409; GO:0005983; GO:0000272	response to cold; starch catabolic process; polysaccharide catabolic process	0.020588	AT4G17090		BAM3
	3	TRITD6Av1G028730	Signal recognition particle protein	GO:0006614; GO:0006886	SRP-dependent cotranslational protein targeting to membrane; intracellular protein transport	0.0203627	AT4G30600
	4	TRITD5Av1G051560	Uveal autoantigen with coiled-coil domains and ankyrin repeats isoform 1 G			0.0203231
TRITD5Bv1G041300 (TdMYB5B189)	1	TRITD0Uv1G001620				0.0256396
	2	TRITD2Av1G206140	Nuclear factor 1 C-type G			0.0251088
	3	TRITD1Bv1G226580	Cytochrome c biogenesis B	GO:0015886; GO:0017004	heme transport; cytochrome complex assembly	0.0239568	ATMG00110	TRITD3Av1G030860	ABCI2
	4	TRITD0Uv1G008380				0.0236624
	5	TRITD2Av1G097030	K+ uptake permease 9 G			0.0234788
	6	TRITD5Av1G090610	DEA(D/H)-box RNA helicase family protein TE			0.0232505
	7	TRITD7Av1G088020	Sec14p-like phosphatidylinositol transfer family protein			0.0226795	AT1G55690
							AT2G21520
							AT3G24840
							AT4G39170
							AT5G56160
	8	TRITD4Bv1G095250	Glycerol kinase G			0.0213905
	9	TRITD3Bv1G146750	magnesium transporter NIPA (DUF803)	GO:1903830; GO:0015693; GO:0006811	magnesium ion transmembrane transport; magnesium ion transport; ion transport	0.0202669	AT5G11960
	10	TRITD2Bv1G119480	Cytochrome c oxidase subunit 1	GO:0006119; GO:1902600; GO:0022900; GO:0009060	oxidative phosphorylation; proton transmembrane transport; electron transport chain; aerobic respiration	0.020242	ATMG01360		COX1
	11	TRITD6Av1G220670	Ankyrin repeat family protein			0.0199532
	12	TRITD6Av1G005530	Protein kinase family protein			0.0199209	AT1G21210		WAK4
							AT1G21230		WAK5
							AT1G21240		WAK3
							AT1G21250		WAK1
							AT1G21270		WAK2
	13	TRITD2Bv1G203970	ATP synthase subunit a	GO:0015986; GO:0045333; GO:0042776; GO:0006754; GO:0006811	ATP synthesis coupled proton transport; cellular respiration; mitochondrial ATP synthesis coupled proton transport; ATP biosynthetic process; ion transport	0.0198978	AT2G07741
							ATMG00410		ATP6,ATP6-1
							ATMG01170		ATP6-2
	14	TRITD0Uv1G017110				0.0197814
	15	TRITD7Av1G065450	Pyridoxamine 5'-phosphate oxidase family protein			0.0195574	AT2G04690	TRITD7Bv1G041890
	16	TRITD1Bv1G182040	ATPase subunit 8	GO:0015986	ATP synthesis coupled proton transport	0.0195037	AT2G07707	TRITD2Bv1G250430
							ATMG00480	TRITD3Av1G099000	ATP8,ORFB
	17	TRITD3Av1G259790	E3 ubiquitin-protein ligase BRE1-like 2	GO:0010162; GO:0045087; GO:0010228; GO:0009965; GO:0010390	seed dormancy process; innate immune response; vegetative to reproductive phase transition of meristem; leaf morphogenesis; histone monoubiquitination	0.0194219	AT1G55250		HUB2
	18	TRITD3Bv1G006290	BTB/POZ domain containing protein, expressed	GO:0016567	protein ubiquitination	0.0193697	AT3G06190		ATBPM2,BPM2
							AT5G19000		ATBPM1,BPM1
	19	TRITD7Bv1G199010				0.0192928	AT3G42170		DAYSLEEPER
TRITD4Bv1G183820 (TdMYB4B184)	1	TRITD5Bv1G220190	Protein kinase family protein			0.030441		TRITD5Bv1G220670
	2	TRITD3Av1G213390	DUF399 family protein, putative (DUF399 and DUF3411)	GO:0015995; GO:0009741	chlorophyll biosynthetic process; response to brassinosteroid	0.0237235	AT2G40400		BPG3	rosette leaf	desaturated green	Rosette leaf::Color::pale
										rosette leaf	decreased size	Rosette leaf::Shape::small
										rosette leaf	increased width	Rosette leaf::Shape::wide
										cauline leaf	decreased size	Cauline leaf::Shape::small
										cauline leaf	present in fewer numbers in organism	Cauline leaf::Number::few
										stem	decreased thickness	Stem::Shape::thin
										stem	desaturated green	Stem::Color::pale
										cauline leaf	desaturated green	Cauline leaf::Color::pale
										whole plant	decreased height	Adult plant::Plant height::short
										sporophyte vegetative stage	decreased speed	Adult plant::Growth::slow
										rosette leaf	abnormal	Rosette leaf::Others
										cauline leaf	epinastic	Cauline leaf::Shape::epinastic
										rosette leaf	dark green	Rosette leaf::Color::dark
										rosette leaf	upturned	Rosette leaf::Shape::hyponastic
										stem	abnormal	Stem::Others
										rosette leaf	increased size	Rosette leaf::Shape::large
										cauline leaf	abnormal	Cauline leaf::Others
										cauline leaf	decreased width	Cauline leaf::Shape::narrow
										stem	increased thickness	Stem::Shape::thick
							AT3G56140
	3	TRITD7Bv1G118700	Purine-uracil permease NCS1			0.0231776	AT5G03555	TRITD7Av1G160600	AtNCS1,NCS1	seed	present in fewer numbers in organism	semi-sterile
	4	TRITD3Bv1G084400	GDSL esterase/lipase G			0.0230123
	5	TRITD3Av1G171110	Bidirectional sugar transporter SWEET	GO:0008643	carbohydrate transport	0.0223335	AT3G14770		AtSWEET2,SWEET2	rosette leaf	desaturated green	Rosette leaf::Color::pale
										stem	desaturated green	Stem::Color::pale
										cauline leaf	abnormal	Cauline leaf::Others
										rosette leaf	abnormal	Rosette leaf::Others
										fruit	abnormal	Silique::Others
										cauline leaf	present in fewer numbers in organism	Cauline leaf::Number::few
										stem	decreased thickness	Stem::Shape::thin
	6	TRITD0Uv1G100480				0.0214697
	7	TRITD7Av1G280400	Serine/threonine-protein kinase	GO:0048544	recognition of pollen	0.0212914	AT2G19130
	8	TRITD3Bv1G009570	Leucine-rich repeat receptor-like protein kinase family protein			0.0211798	AT2G34930
	9	TRITD2Av1G285970	Receptor-like kinase			0.0204705
	10	TRITD7Av1G160600	Purine-uracil permease NCS1			0.0202335	AT5G03555	TRITD7Bv1G118700	AtNCS1,NCS1	seed	present in fewer numbers in organism	semi-sterile
	11	TRITD2Av1G009970	Cytochrome P450			0.0198076	AT3G48310		CYP71A22
	12	TRITD2Bv1G197440	SPX domain-containing family protein	GO:0055062; GO:0006817	phosphate ion homeostasis; phosphate ion transport	0.0198073	AT1G63010
							AT4G11810
							AT4G22990
	13	TRITD3Bv1G023720	Serine/threonine-protein kinase	GO:0048544	recognition of pollen	0.0196264
	14	TRITD2Av1G031220	3-oxo-5-alpha-steroid 4-dehydrogenase family protein			0.0196064	AT5G16010
	15	TRITD5Av1G108190	Protein DETOXIFICATION	GO:1990961	xenobiotic detoxification by transmembrane export across the plasma membrane	0.0194492	AT1G33080
							AT1G33090
							AT1G33100
							AT1G33110
	16	TRITD3Av1G150760	Cytochrome P450			0.019287	AT3G14610		CYP72A7
							AT3G14630		CYP72A9
							AT3G14640		CYP72A10
							AT3G14650		CYP72A11
							AT3G14680		CYP72A14
							AT3G14690		CYP72A15
	17	TRITD3Bv1G196080	DUF399 family protein, putative (DUF399 and DUF3411)			0.019145	AT2G40400			rosette leaf	desaturated green	Rosette leaf::Color::pale
										rosette leaf	decreased size	Rosette leaf::Shape::small
										rosette leaf	increased width	Rosette leaf::Shape::wide
										cauline leaf	decreased size	Cauline leaf::Shape::small
										cauline leaf	present in fewer numbers in organism	Cauline leaf::Number::few
										stem	decreased thickness	Stem::Shape::thin
										stem	desaturated green	Stem::Color::pale
										cauline leaf	desaturated green	Cauline leaf::Color::pale
										whole plant	decreased height	Adult plant::Plant height::short
										sporophyte vegetative stage	decreased speed	Adult plant::Growth::slow
										rosette leaf	abnormal	Rosette leaf::Others
										cauline leaf	epinastic	Cauline leaf::Shape::epinastic
										rosette leaf	dark green	Rosette leaf::Color::dark
										rosette leaf	upturned	Rosette leaf::Shape::hyponastic
										stem	abnormal	Stem::Others
										rosette leaf	increased size	Rosette leaf::Shape::large
										cauline leaf	abnormal	Cauline leaf::Others
										cauline leaf	decreased width	Cauline leaf::Shape::narrow
										stem	increased thickness	Stem::Shape::thick
							AT3G56140
	18	TRITD2Bv1G248910	Thiol-disulfide oxidoreductase DCC	GO:0031099; GO:0040007; GO:0048589	regeneration; growth; developmental growth	0.0189954	AT5G50100	TRITD2Av1G282260
